# Supplementary material for: Altered oral and gut microbiota and its association with SARS-CoV-2 viral load in COVID-19 patients during hospitalization
Source: PubMed Central journal article supplement (PMC8298611; doi:10.1038/s41522-021-00232-5), 2021-07-22
Supplement: 41522_2021_232_MOESM1_ESM.pdf [file 41522_2021_232_MOESM1_ESM.pdf]

# **Altered oral and gut microbiota and its association with SARS-CoV-2 viral load in COVID-19 patients during hospitalization**

Yongjian Wu<sup>1,2,3,4,5,+</sup>, Xiaomin Cheng<sup>2,+</sup>, Guangmin Jiang<sup>1,3,+</sup>, Huishu Tang<sup>1,3</sup>, Siqu Ming<sup>1,3,5</sup>, Lantian Tang<sup>1,3</sup>, Jiahai Lu<sup>2,\*</sup>, Cheng Guo<sup>6,\*</sup>, Hong Shan<sup>3,4,\*</sup>, and Xi Huang<sup>1,3,4,5,\*</sup>

<sup>1</sup> Center for Infection and Immunity, the Fifth Affiliated Hospital, Sun Yat-sen University, Zhuhai, Guangdong Province, 519000, China

<sup>2</sup> School of public health, Sun Yat-sen University, Guangzhou, Guangdong Province, 510080, China

<sup>3</sup> Guangdong Provincial Engineering Research Center of Molecular Imaging, Guangdong Provincial Key Laboratory of Biomedical Imaging, and Department of Interventional Medicine, the Fifth Affiliated Hospital, Sun Yat-sen University, Zhuhai, Guangdong Province, 519000, China

<sup>4</sup> Southern Marine Science and Engineering Guangdong Laboratory, Zhuhai, Guangdong Province, 519000, China.

<sup>5</sup> National Clinical Research Center for Infectious Disease, Shenzhen Third People' s Hospital; the Second Affiliated Hospital of Southern University of Science and Technology, Shenzhen, Guangdong Province, 518112, China.

<sup>6</sup> Center for Infection and Immunity, Mailman School of Public Health, Columbia University, New York, NY, 10032, USA

<sup>+</sup> These authors contributed equally to this work.

<sup>\*</sup> Corresponding author:

Xi Huang, Email: [huangxi6@mail.sysu.edu.cn](mailto:huangxi6@mail.sysu.edu.cn)

Hong Shan, Email: [shanhong@mail.sysu.edu.cn](mailto:shanhong@mail.sysu.edu.cn)

Cheng Guo, Email: [cg2984@cumc.columbia.edu](mailto:cg2984@cumc.columbia.edu)

Jiahai Lu, Email: [lujiahai@mail.sysu.edu.cn](mailto:lujiahai@mail.sysu.edu.cn)

**Supplementary Table 1. Samples and subjects characteristics by sample types**

| <b>Group</b>                         | <b>PT</b>        | <b>HT</b>        | <b>PF</b>        | <b>HF</b>        |
|--------------------------------------|------------------|------------------|------------------|------------------|
| <b>Samples characteristics</b>       |                  |                  |                  |                  |
| Sample collected                     | 140              | 44               | 81               | 32               |
| Viral RNA nucleic acid test, n/N (%) |                  |                  |                  |                  |
| Viral RNA positive                   | 52/140 (37.1)    | /                | 50/81 (61.7)     | /                |
| Viral RNA negative                   | 88/140 (62.9)    | /                | 31/81 (38.3)     | /                |
| <b>Subjects characteristics</b>      |                  |                  |                  |                  |
| Individual enrolled                  | 52               | 44               | 36               | 32               |
| Gender                               |                  |                  |                  |                  |
| Female, n/N (%)                      | 22/52 (42.3)     | 13/44 (29.5)     | 13/36 (36.1)     | 11/32 (34.4)     |
| Male, n/N (%)                        | 30/52 (57.7)     | 31/44 (70.5)     | 23/36 (63.9)     | 21/32 (65.6)     |
| Median age, y (IQR)                  | 48.5 (32.0-64.0) | 41.5 (36.3-51.0) | 45.0 (32.0-63.5) | 46.5 (42.3-53.0) |
| Antibiotic therapy, n/N (%)          |                  |                  |                  |                  |
| Yes                                  | 35/52 (67.3)     | /                | 23/36 (63.9)     | /                |
| No                                   | 17/52 (32.7)     | /                | 13/36 (36.1)     | /                |
| Antivirus therapy, n/N (%)           |                  |                  |                  |                  |
| Yes                                  | 45/52 (86.5)     | /                | 33/36 (91.7)     | /                |
| No                                   | 7/52 (13.5)      | /                | 3/36 (8.3)       | /                |
| Disease severity, n/N (%)            |                  |                  |                  |                  |
| Severe patients                      | 22/52 (42.3)     | /                | 10/36 (27.8)     | /                |
| Non-severe patients                  | 30/52 (57.7)     | /                | 26/36 (72.2)     | /                |

**Supplementary Table 2. Significantly distinct bacterial taxa identified between PT and HT groups**

| Taxonomy                                  | Group | LEfSe analysis |             | MaAsLin2    |             |
|-------------------------------------------|-------|----------------|-------------|-------------|-------------|
|                                           |       | LDA            | p-value     | Coefficient | p-value     |
| <i>Haemophilus_para</i> <i>influenzae</i> | PT    | 4.058623       | 6.36E-06    | 0.125162812 | 0.001951781 |
| <i>g__Veillonella</i>                     | PT    | 3.85207        | 3.05E-05    | 0.09671795  | 0.000675973 |
| <i>g__Campylobacter</i>                   | PT    | 3.745349       | 4.85E-10    | 0.048989136 | 0.031114751 |
| <i>Rothia_mucilaginosa</i>                | PT    | 3.689566       | 1.62E-07    | 0.096630977 | 0.001737089 |
| <i>g__Granulicatella</i>                  | PT    | 3.63394        | 6.66E-14    | 0.118068456 | 2.48E-09    |
| <i>Neisseria_subflava</i>                 | PT    | 3.515048       | 5.66E-15    | 0.08987035  | 0.000444571 |
| <i>g__Kingella</i>                        | PT    | 2.418025032    | 0.017809877 | 0.027200862 | 0.001758148 |
| <i>g__Filifactor</i>                      | PT    | 2.073658868    | 0.003775443 | 0.019049393 | 0.019959509 |
| <i>g__Neisseria</i>                       | HT    | 4.472161       | 8.38E-10    | 0.176739452 | 0.002368994 |
| <i>g__Corynebacterium</i>                 | HT    | 4.09779        | 3.77E-09    | 0.145215834 | 0.001622564 |
| <i>g__Actinobacillus</i>                  | HT    | 3.298003       | 8.70E-08    | 0.060967757 | 0.001859568 |
| <i>g__Moryella</i>                        | HT    | 2.977811       | 0.000114    | 0.049638066 | 2.08E-05    |
| <i>g__Aggregatibacter</i>                 | HT    | 2.952906432    | 0.000193928 | 0.046915302 | 0.002470034 |
| <i>Prevotella_intermedia</i>              | HT    | 2.88642374     | 0.000239621 | 0.057586129 | 0.00011425  |
| <i>g__Treponema</i>                       | HT    | 2.84726        | 4.07E-05    | 0.068294957 | 0.000158995 |
| <i>g__Pseudomonas</i>                     | HT    | 2.371535       | 6.24E-06    | 0.01469195  | 0.020469811 |
| <i>Treponema_amylovorum</i>               | HT    | 2.2748496      | 0.000737184 | 0.02417771  | 0.004387391 |

**Supplementary Table 3. Significantly distinct bacterial taxa identified between PT(NS) and PT(S) groups as well as PT(abx-) and HT groups**

| Taxonomy                       | Group    | LEfSe analysis |             | MaAsLin2    |             |
|--------------------------------|----------|----------------|-------------|-------------|-------------|
|                                |          | LDA            | p-value     | Coefficient | p-value     |
| <b>PT(NS) vs. PT(S)</b>        |          |                |             |             |             |
| <i>g__Treponema</i>            | PT(NS)   | 2.984098       | 5.17E-05    | 0.048845779 | 0.002277567 |
| <i>g__Aggregatibacter</i>      | PT(NS)   | 2.900273       | 1.43E-07    | 0.038650386 | 0.001778637 |
| <i>Aggregatibacter_segis</i>   | PT(NS)   | 2.866217       | 5.00E-06    | 0.037485104 | 0.002347917 |
| <i>Prevotella_intermedia</i>   | PT(NS)   | 2.844975       | 3.00E-06    | 0.052287605 | 6.30E-06    |
| <i>Streptococcus_anginosus</i> | PT(NS)   | 2.67914        | 0.002821    | 0.036319592 | 9.70E-05    |
| <i>g__Selenomonas</i>          | PT(NS)   | 2.67119        | 0.001722    | 0.027628854 | 0.004508061 |
| <i>g__Filifactor</i>           | PT(NS)   | 2.499093       | 6.39E-05    | 0.020426422 | 0.003365447 |
| <i>Treponema_amylovorum</i>    | PT(NS)   | 2.465991       | 0.001781    | 0.020520184 | 0.001860472 |
| <i>g__Peptococcus</i>          | PT(NS)   | 2.276831       | 0.002267    | 0.017592997 | 0.003143184 |
| <b>PT(abx-) vs. HT</b>         |          |                |             |             |             |
| <i>Neisseria_subflava</i>      | PT(abx-) | 3.772602791    | 7.55E-16    | 0.134291103 | 0.001160573 |
| <i>g__Granulicatella</i>       | PT(abx-) | 3.728665341    | 5.55E-14    | 0.089398883 | 0.000787813 |
| <i>g__Veillonella</i>          | PT(abx-) | 3.708256093    | 5.53E-05    | 0.149621381 | 9.72E-05    |
| <i>g__Campylobacter</i>        | PT(abx-) | 3.688631824    | 6.16E-06    | 0.140870823 | 0.000120171 |
| <i>Rothia_mucilaginoso</i>     | PT(abx-) | 3.461218724    | 6.00E-08    | 0.15283721  | 6.75E-07    |
| <i>Veillonella_dispar</i>      | PT(abx-) | 3.383724644    | 0.03595859  | 0.150075686 | 0.001992298 |
| <i>g__Peptoniphilus</i>        | PT(abx-) | 2.428251       | 0.002413    | 0.035286204 | 0.009795435 |
| <i>g__Moryella</i>             | HT       | 3.086687563    | 5.56E-05    | 0.055519744 | 0.018107181 |
| <i>g__Treponema</i>            | HT       | 2.922628735    | 0.001077494 | 0.076820179 | 0.004423529 |
| <i>Prevotella_intermedia</i>   | HT       | 2.8154732      | 0.004906798 | 0.065129511 | 0.011724276 |

**Supplementary Table 4. Significantly distinct bacterial taxa identified between PF and HF groups**

| Taxonomy                       | Group | LEfSe analysis |             | MaAsLin2    |             |
|--------------------------------|-------|----------------|-------------|-------------|-------------|
|                                |       | LDA            | p-value     | Coefficient | p-value     |
| <i>g__Streptococcus</i>        | PF    | 4.07039439     | 9.81E-06    | 0.294723786 | 0.000230565 |
| <i>g__Weissella</i>            | PF    | 3.517819013    | 8.26E-05    | 0.101335921 | 0.014669427 |
| <i>g__Enterococcus</i>         | PF    | 3.199232248    | 2.80E-05    | 0.089347099 | 0.000623727 |
| <i>Clostridium_citroniae</i>   | PF    | 3.088746       | 5.85E-05    | 0.052788354 | 0.007081948 |
| <i>Bifidobacterium_longum</i>  | PF    | 2.976288515    | 7.88E-07    | 0.044654773 | 0.017956597 |
| <i>Rothia_mucilaginosa</i>     | PF    | 2.947328878    | 0.000177757 | 0.079359876 | 1.08E-05    |
| <i>g__Rothia</i>               | PF    | 2.939548147    | 0.002789322 | 0.076703639 | 1.77E-05    |
| <i>g__Lactobacillus</i>        | PF    | 2.831048869    | 0.017048742 | 0.065256175 | 0.004378413 |
| <i>g__Actinomyces</i>          | PF    | 2.536534912    | 0.000329375 | 0.038366765 | 0.002006929 |
| <i>g__Granulicatella</i>       | PF    | 2.397197       | 3.41E-06    | 0.024857664 | 0.002892692 |
| <i>g__Blautia</i>              | HF    | 3.836604       | 1.39E-12    | 0.123614968 | 3.67E-05    |
| <i>g__Coprococcus</i>          | HF    | 3.619681       | 1.16E-12    | 0.100262772 | 1.59E-05    |
| <i>Bacteroides_caccae</i>      | HF    | 3.118124487    | 4.02E-09    | 0.07527124  | 0.004790875 |
| <i>Bacteroides_coprophilus</i> | HF    | 2.859626       | 7.36E-16    | 0.034969496 | 0.017497726 |
| <i>Blautia_obeum</i>           | HF    | 2.777926       | 2.03E-11    | 0.046428815 | 0.000573894 |
| <i>Clostridium_colinum</i>     | HF    | 2.458573       | 6.52E-15    | 0.024786391 | 0.0016486   |
| <i>g__Collinsella</i>          | HF    | 2.209255       | 2.68E-05    | 0.03146611  | 0.018499252 |

Supplementary Table 5. Significantly distinct bacterial taxa identified between PF(abx-) and HF groups

| Taxonomy                       | Group    | LEfSe analysis |          | MaAsLin2    |             |
|--------------------------------|----------|----------------|----------|-------------|-------------|
|                                |          | LDA            | p-value  | Coefficient | p-value     |
| <i>g__Streptococcus</i>        | PF(abx-) | 3.693343       | 0.000352 | 0.090926687 | 0.003154147 |
| <i>Clostridium_citroniae</i>   | PF(abx-) | 3.268273       | 1.10E-05 | 0.05066731  | 0.004119379 |
| <i>g__Anaerococcus</i>         | PF(abx-) | 3.070141       | 0.001968 | 0.055366168 | 0.000344614 |
| <i>Streptococcus_anginosus</i> | PF(abx-) | 3.032709       | 0.002302 | 0.04131649  | 0.002373282 |
| <i>g__Peptoniphilus</i>        | PF(abx-) | 3.016881       | 0.000433 | 0.053420717 | 0.000245755 |
| <i>g__Campylobacter</i>        | PF(abx-) | 2.533064       | 0.048023 | 0.024358408 | 0.004861695 |
| <i>g__Atopobium</i>            | PF(abx-) | 2.350014       | 0.000433 | 0.008465937 | 0.009964554 |
| <i>g__Blautia</i>              | HF       | 3.864694       | 2.73E-09 | 0.139410699 | 6.99E-08    |
| <i>g__Coprococcus</i>          | HF       | 3.581713       | 2.71E-07 | 0.084764896 | 1.81E-05    |
| <i>Bacteroides_eggerthii</i>   | HF       | 3.064006       | 1.04E-08 | 0.056029014 | 0.001243332 |
| <i>Bacteroides_coprophilus</i> | HF       | 2.853866       | 3.17E-07 | 0.037224891 | 0.00847245  |
| <i>Blautia_obelum</i>          | HF       | 2.812043       | 7.68E-06 | 0.044527621 | 0.000173239 |
| <i>Blautia_producta</i>        | HF       | 2.76882        | 0.00015  | 0.036507669 | 0.003013506 |
| <i>g__Anaerostipes</i>         | HF       | 2.686756       | 0.000189 | 0.032725558 | 0.002400145 |
| <i>Clostridium_colinum</i>     | HF       | 2.514328       | 1.20E-07 | 0.022969211 | 0.001295239 |
| <i>g__Neisseria</i>            | HF       | 2.501995       | 2.71E-06 | 0.02405077  | 0.003672718 |

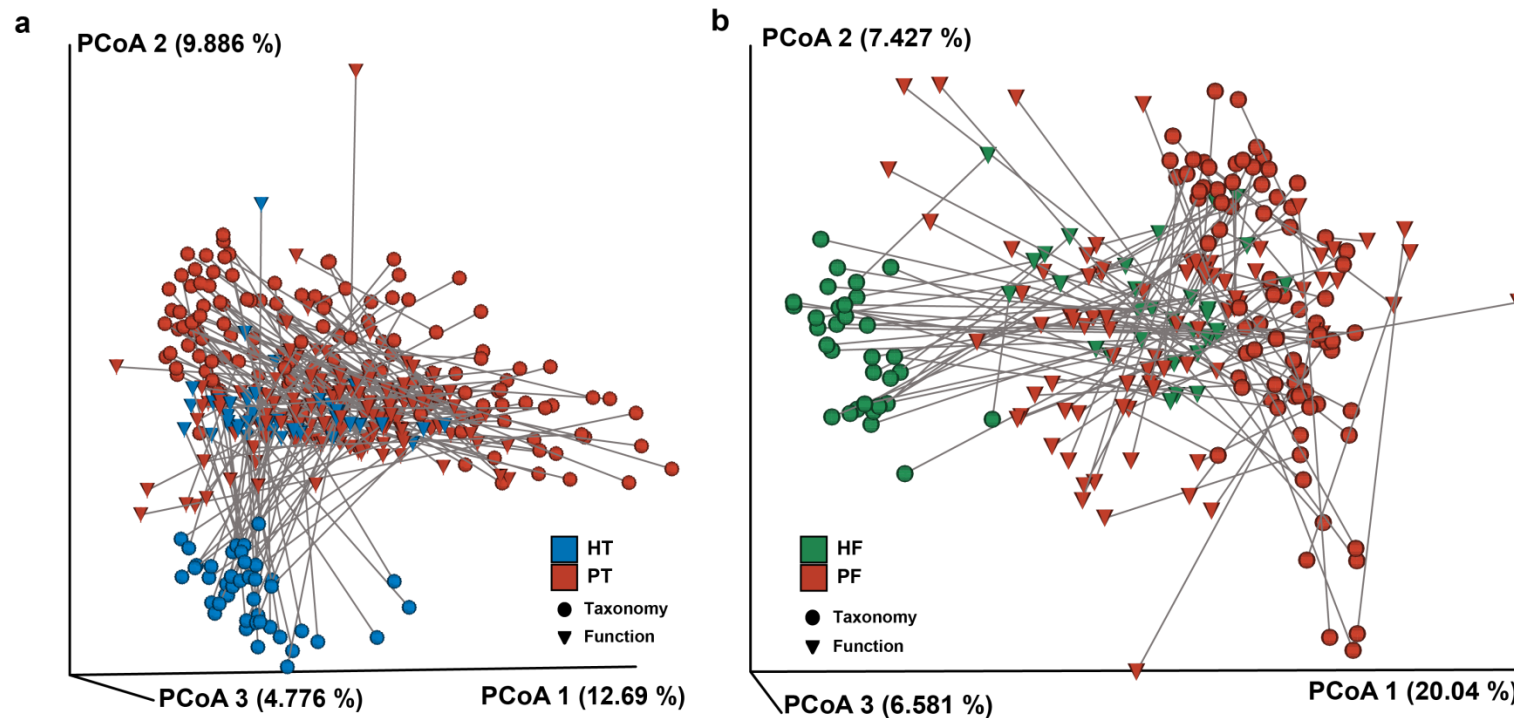

**Supplementary Fig. 1 Procrustes analyses demonstrated a significant correlation between the potential function profile and microbial composition. a** Oral microbiota. **b** Gut microbiota. PT group and HT group are colored in red and blue, respectively; PF group and HF group are colored in red and green, respectively. The squares indicate 16S rRNA gene OTU data of microbial composition, and the triangles indicate the potential function profile.

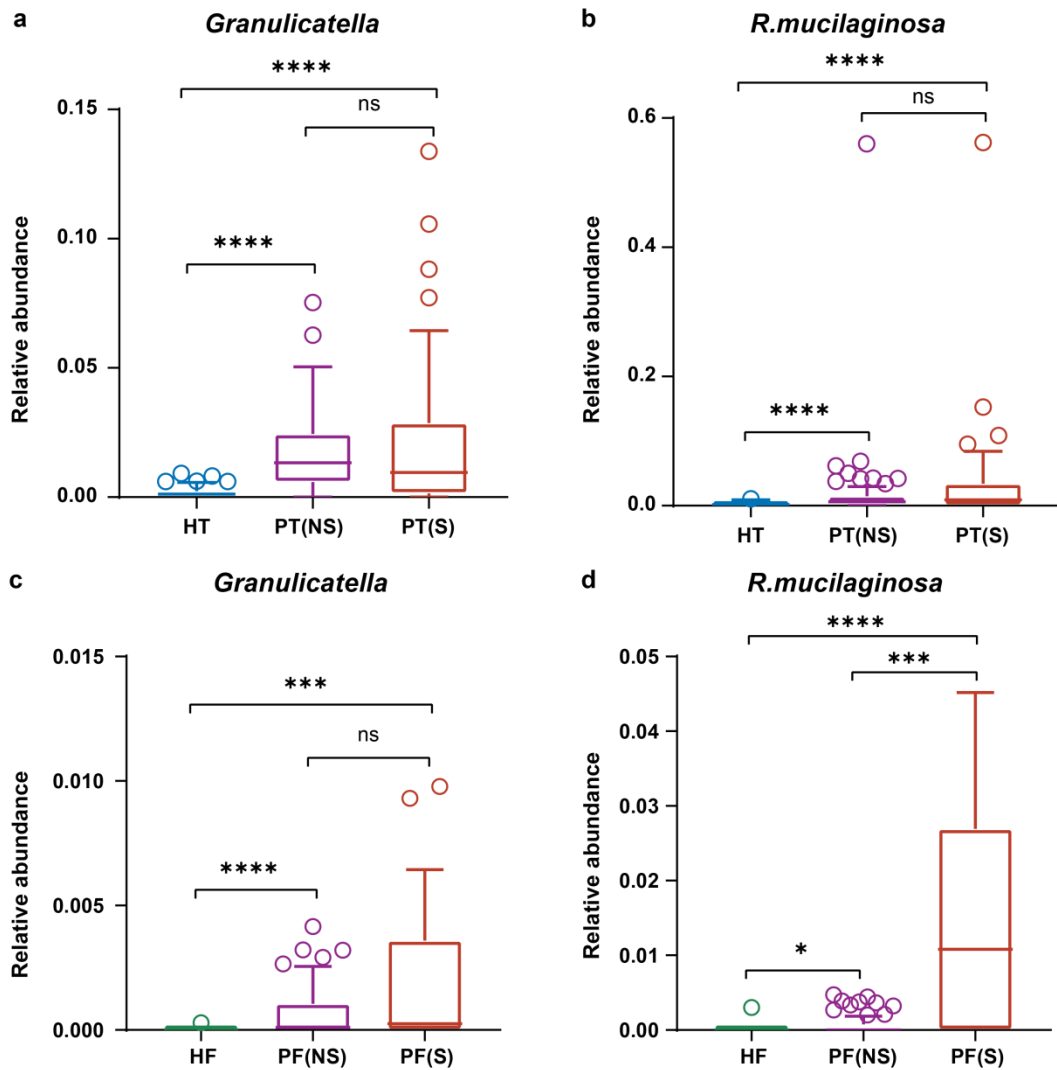

**Supplementary Fig. 2 Relative abundance of the oral and gut microbiota among the healthy controls, patients with the non-severe condition, and patients with the severe condition.** **a** Relative abundance of *Granulicatella* among HT, PT(NS) and PT(S). **b** Relative abundance of *R. mucilaginosa* among HT, PT(NS) and PT(S). **c** Relative abundance of *Granulicatella* among HF, PF(NS) and PF(S). **d** Relative abundance of *R. mucilaginosa* among HF, PF(NS) and PF(S). ns: not significant, \* $p < 0.05$ , \*\*\*  $p < 0.001$ , \*\*\*\* $p < 0.0001$ .  $p$  values were obtained using the Kruskal-Wallis test followed by Dunn's multiple comparisons test. The line in the middle of the box, bound of the box and whiskers represent the median, 25th-75th percentiles and min-to-max values, respectively.
